# Supplementary figures and images for: Flexible and highly interconnected, multi-scale patterned chitosan porous membrane produced in situ from mussel shell to accelerate wound healing
Source: Royal Society of Chemistry journal article supplement (doi:10.1039/c7bm00095b), 2017-01-01

Supporting information

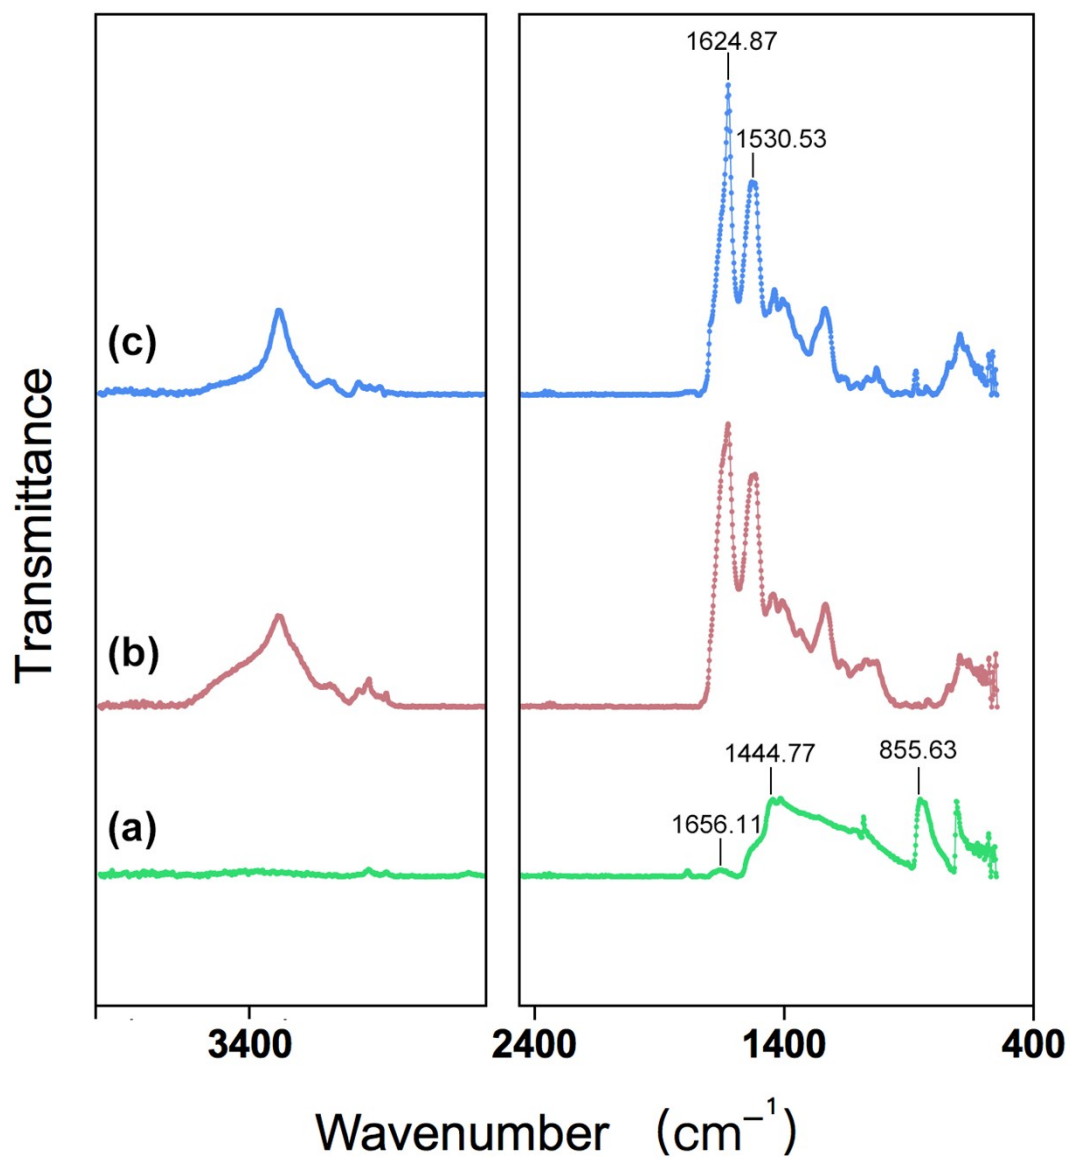

Fig. S1 The FT-IR spectra of the hard shell (a), A-shell (b) and B-shell (c).

Supplement: c7bm00095b1.pdf [file c7bm00095b1.pdf]
